# Supplementary material
Source: PubMed Central journal article supplement (PMC8495085)
Supplement: CLC-44-1475-s001.pdf [file CLC-44-1475-s001.pdf]

Supplementary materials:

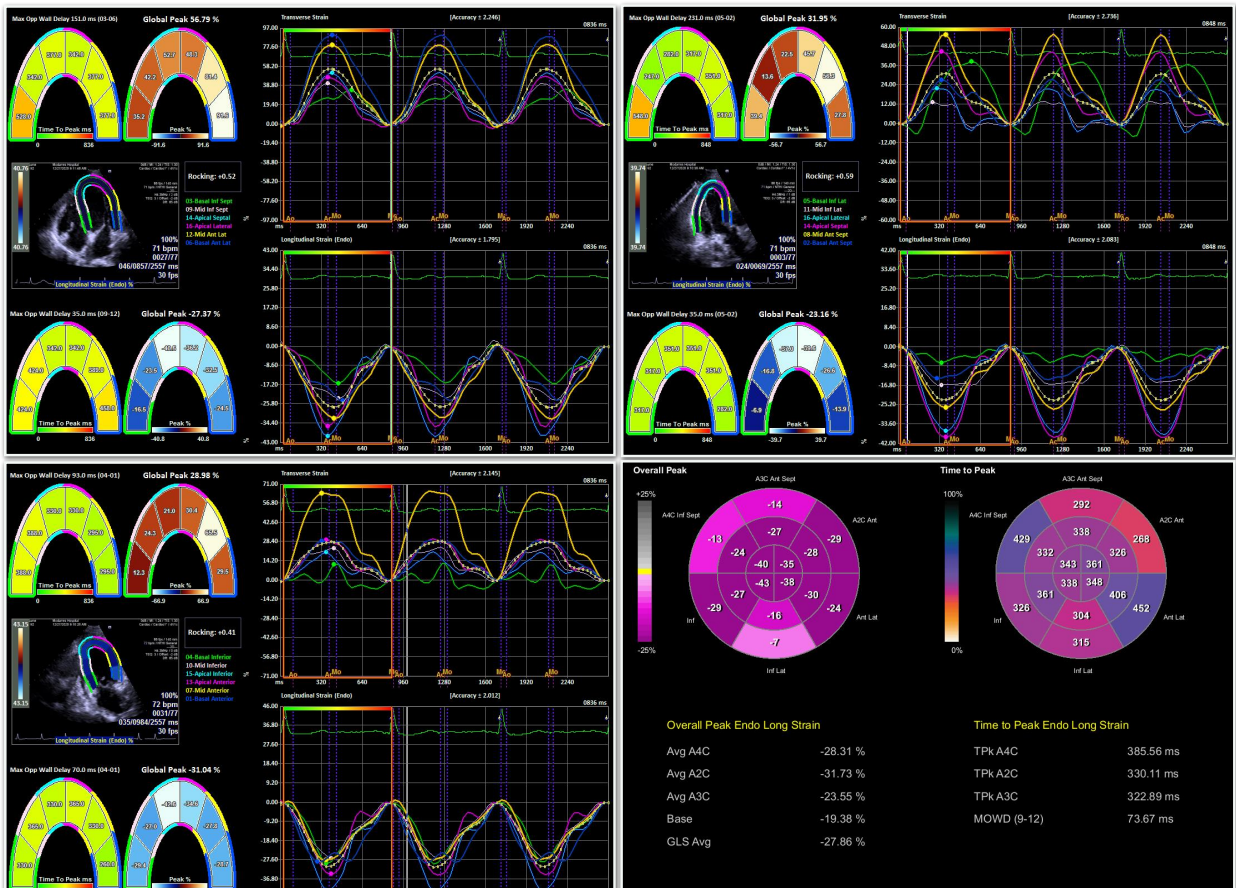

Supplementary Figure 1. Left ventricular endocardial margin was traced manually in 3 views (4-chamber, 3-chamber and 2-chamber). Then left ventricular global longitudinal strain (LVGLS) and bull's eye were automatically calculated by the device.

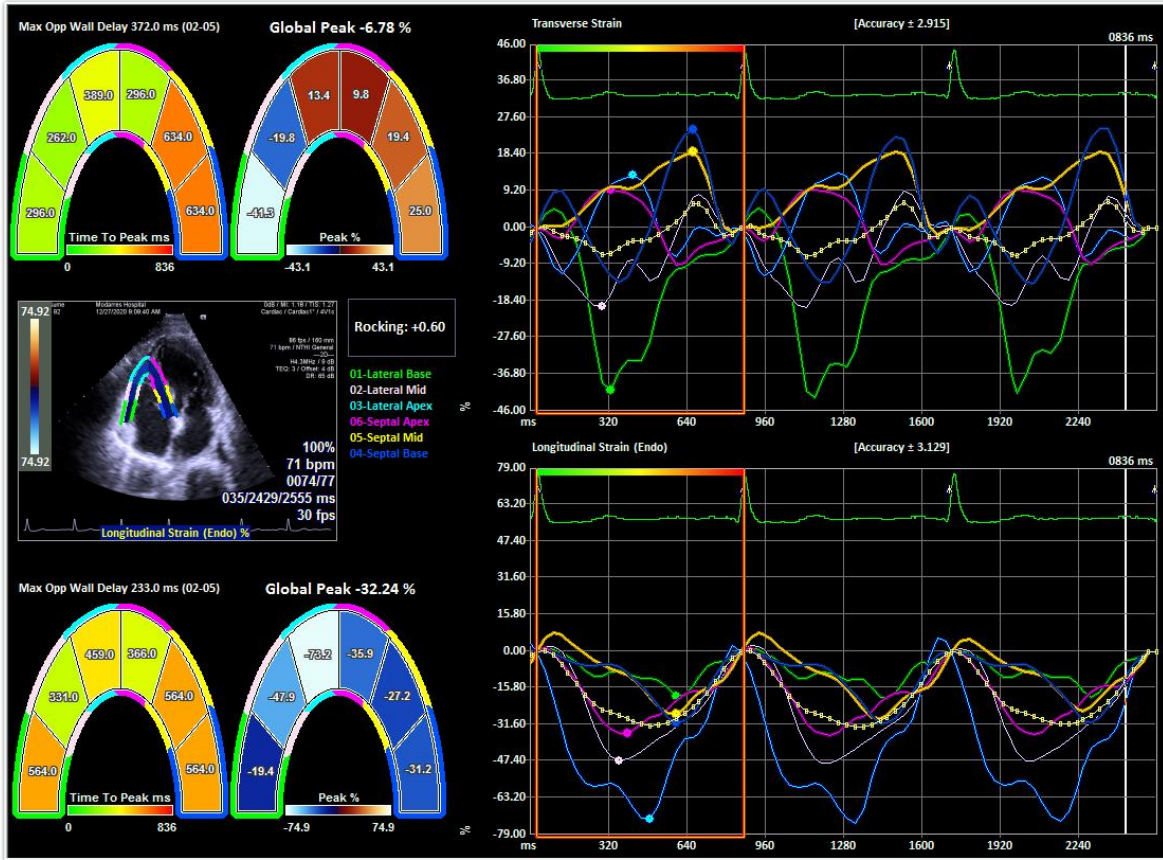

**Supplementary Figure 2.** Right ventricular endocardial margin was traced manually in the 4-chamber view. Then right ventricular global longitudinal strain (RVGLS) was automatically calculated by the device.

**Supplementary Table 1- Echocardiographic measurements according to the outcome of  
COVID-19 patients**

|                     | Outcome  |                    |         |                    |             | Ward  |                    |          |                    |         |                    | Intubation  |       |                    |       |                    |             |
|---------------------|----------|--------------------|---------|--------------------|-------------|-------|--------------------|----------|--------------------|---------|--------------------|-------------|-------|--------------------|-------|--------------------|-------------|
|                     | Survived |                    | Expired |                    | P Value     | ICU   |                    | Post-ICU |                    | Routine |                    | P Value     | Yes   |                    | No    |                    |             |
|                     | Mean     | Standard Deviation | Mean    | Standard Deviation |             | Mean  | Standard Deviation | Mean     | Standard Deviation | Mean    | Standard Deviation |             | Mean  | Standard Deviation | Mean  | Standard Deviation | P Value     |
| <b>LVEF</b>         | 59.35    | 9.10               | 51.77   | 10.48              | <b>.001</b> | 53.38 | 9.59               | 55.32    | 8.95               | 60.68   | 8.90               | <b>.001</b> | 54.89 | 7.87               | 58.89 | 9.61               | .089        |
| <b>LVEDD</b>        | 45.24    | 4.97               | 44.23   | 6.26               | .383        | 44.68 | 5.80               | 45.25    | 5.27               | 45.24   | 4.91               | .823        | 43.06 | 4.11               | 45.33 | 5.17               | .072        |
| <b>LVESD</b>        | 30.12    | 6.48               | 30.50   | 11.25              | .813        | 30.95 | 8.93               | 30.54    | 5.49               | 29.86   | 6.82               | .663        | 29.72 | 7.19               | 30.20 | 7.11               | .785        |
| <b>IVSD</b>         | 10.94    | 9.15               | 12.32   | 4.03               | .486        | 11.33 | 3.36               | 13.34    | 15.08              | 10.56   | 8.09               | .305        | 12.06 | 4.65               | 10.99 | 9.05               | .624        |
| <b>E/A</b>          | 1.12     | .30                | 1.20    | .66                | .293        | 1.14  | .52                | 1.05     | .26                | 1.14    | .31                | .455        | 1.12  | .32                | 1.13  | .36                | .920        |
| <b>E'</b>           | 7.98     | 2.29               | 5.73    | 1.78               | <b>.001</b> | 6.20  | 1.77               | 7.11     | 2.27               | 8.31    | 2.28               | <b>.001</b> | 6.06  | 1.83               | 7.90  | 2.32               | <b>.001</b> |
| <b>LAVI</b>         | 29.20    | 5.22               | 31.95   | 6.89               | <b>.025</b> | 30.63 | 6.10               | 30.07    | 6.17               | 29.05   | 5.11               | .231        | 30.17 | 5.82               | 29.43 | 5.45               | .586        |
| <b>RVEDD</b>        | 28.12    | 14.72              | 31.00   | 10.50              | .374        | 29.08 | 8.68               | 28.35    | 4.81               | 28.25   | 16.75              | .950        | 31.67 | 11.51              | 28.12 | 14.56              | .316        |
| <b>RV FAC</b>       | 46.20    | 10.55              | 33.47   | 11.81              | <b>.001</b> | 36.99 | 11.57              | 42.44    | 11.65              | 47.59   | 10.08              | <b>.001</b> | 37.12 | 9.28               | 45.58 | 11.29              | <b>.002</b> |
| <b>S Velocity</b>   | 12.91    | 2.32               | 12.18   | 3.06               | .180        | 12.13 | 2.78               | 12.79    | 2.75               | 13.05   | 2.20               | .101        | 12.06 | 2.44               | 12.91 | 2.41               | .152        |
| <b>TAPSE</b>        | 20.99    | 3.04               | 18.36   | 3.92               | <b>.001</b> | 18.98 | 3.65               | 19.75    | 3.57               | 21.41   | 2.80               | <b>.001</b> | 18.11 | 2.14               | 20.96 | 3.22               | <b>.001</b> |
| <b>TRPV</b>         | 2.48     | 1.54               | 2.59    | .40                | .746        | 2.45  | .41                | 2.51     | .27                | 2.51    | 1.77               | .971        | 2.61  | .36                | 2.48  | 1.52               | .738        |
| <b>Systolic PAP</b> | 28.45    | 6.68               | 41.82   | 14.85              | <b>.001</b> | 35.63 | 14.05              | 30.75    | 4.87               | 28.04   | 6.71               | <b>.001</b> | 40.67 | 14.26              | 28.84 | 7.51               | <b>.001</b> |

LVEF: left ventricular ejection fraction, LVEDD: left ventricular end-diastolic diameter, LVESD: left ventricular end-systolic diameter, IVSD: interventricular septal diameter, LAVI: left atrial volume index, RVEDD: right ventricular end-diastolic diameter, RV FAC: right ventricular fractional area change, TAPSE: tricuspid annular plane systolic excursion, TRPV: tricuspid regurgitation peak velocity, PAP: pulmonary artery pressure, ICU: Intensive Care Unit

**Supplementary Table 2- Echocardiographic measurements in tertiles for LVGLS**

|              |                | LVGLS Tertiles |        |       |       |             |
|--------------|----------------|----------------|--------|-------|-------|-------------|
|              |                | Lower          | Middle | Upper | Total | P Value     |
| LVEF         | Mean           | 52.19          | 59.22  | 64.22 | 58.54 | <b>.001</b> |
|              | Std. Deviation | 8.92           | 7.69   | 7.86  | 9.52  |             |
| LVEDD        | Mean           | 45.87          | 45.71  | 43.81 | 45.13 | <b>.031</b> |
|              | Std. Deviation | 5.58           | 4.89   | 4.65  | 5.12  |             |
| LVESD        | Mean           | 31.29          | 30.07  | 29.12 | 30.16 | .197        |
|              | Std. Deviation | 8.14           | 7.86   | 4.73  | 7.10  |             |
| IVSD         | Mean           | 12.99          | 10.65  | 9.61  | 11.08 | .066        |
|              | Std. Deviation | 14.39          | 3.62   | 2.42  | 8.75  |             |
| E/A          | Mean           | 1.09           | 1.09   | 1.19  | 1.12  | .180        |
|              | Std. Deviation | .42            | .34    | .29   | .35   |             |
| E'           | Mean           | 7.00           | 7.58   | 8.64  | 7.74  | <b>.001</b> |
|              | Std. Deviation | 2.41           | 2.17   | 2.16  | 2.34  |             |
| LAVI         | Mean           | 30.96          | 29.65  | 27.87 | 29.49 | <b>.004</b> |
|              | Std. Deviation | 6.42           | 4.75   | 4.70  | 5.47  |             |
| RVEDD        | Mean           | 29.15          | 26.93  | 29.20 | 28.43 | .571        |
|              | Std. Deviation | 7.18           | 3.69   | 23.53 | 14.33 |             |
| RV FAC       | Mean           | 40.61          | 45.04  | 48.89 | 44.84 | <b>.001</b> |
|              | Std. Deviation | 12.02          | 10.74  | 9.81  | 11.36 |             |
| S Velocity   | Mean           | 12.22          | 13.04  | 13.25 | 12.84 | <b>.029</b> |
|              | Std. Deviation | 2.71           | 2.10   | 2.30  | 2.42  |             |
| TAPSE        | Mean           | 19.49          | 21.32  | 21.33 | 20.71 | <b>.001</b> |
|              | Std. Deviation | 3.58           | 2.76   | 3.00  | 3.23  |             |
| TRPV         | Mean           | 2.71           | 2.42   | 2.35  | 2.50  | .307        |
|              | Std. Deviation | 2.38           | .75    | .35   | 1.46  |             |
| Systolic PAP | Mean           | 31.87          | 28.58  | 29.16 | 29.87 | .068        |
|              | Std. Deviation | 9.26           | 7.75   | 9.40  | 8.91  |             |

LVGLS: left ventricular global longitudinal strain, LVEF: left ventricular ejection fraction, LVEDD: left ventricular end-diastolic diameter, LVESD: left ventricular end- systolic diameter, IVSD: interventricular septal diameter, LAVI: left atrial volume index, RVEDD: right ventricular end- diastolic diameter, RV FAC: right ventricular fractional area change, TAPSE: tricuspid annular plane systolic excursion, TRPV: tricuspid regurgitation peak velocity, PAP: pulmonary artery pressure, ICU: Intensive Care Unit

**Supplementary Table 3- Echocardiographic measurements in tertiles for RVGLS**

|              |                | RVGLS |        |       |       | P Value |
|--------------|----------------|-------|--------|-------|-------|---------|
|              |                | Lower | Middle | Upper | Total |         |
| LVEF         | Mean           | 53.96 | 58.13  | 63.54 | 58.54 | .001    |
|              | Std. Deviation | 10.13 | 7.37   | 8.41  | 9.52  |         |
| LVEDD        | Mean           | 45.59 | 44.74  | 45.06 | 45.13 | .614    |
|              | Std. Deviation | 5.69  | 5.24   | 4.38  | 5.12  |         |
| LVESD        | Mean           | 31.72 | 29.84  | 28.92 | 30.16 | .060    |
|              | Std. Deviation | 7.71  | 6.69   | 6.67  | 7.10  |         |
| IVSD         | Mean           | 11.62 | 12.09  | 9.54  | 11.08 | .192    |
|              | Std. Deviation | 9.76  | 11.29  | 2.39  | 8.75  |         |
| E/A          | Mean           | 1.09  | 1.12   | 1.16  | 1.12  | .517    |
|              | Std. Deviation | .45   | .31    | .28   | .35   |         |
| E'           | Mean           | 6.84  | 7.78   | 8.59  | 7.74  | .001    |
|              | Std. Deviation | 2.48  | 2.04   | 2.17  | 2.34  |         |
| LAVI         | Mean           | 30.58 | 30.14  | 27.75 | 29.49 | .004    |
|              | Std. Deviation | 6.24  | 5.17   | 4.50  | 5.47  |         |
| RVEDD        | Mean           | 28.47 | 30.43  | 26.38 | 28.43 | 0.252   |
|              | Std. Deviation | 7.54  | 23.41  | 3.05  | 14.33 |         |
| RV FAC       | Mean           | 36.54 | 46.13  | 51.87 | 44.84 | .001    |
|              | Std. Deviation | 10.25 | 9.41   | 8.70  | 11.36 |         |
| S Velocity   | Mean           | 12.10 | 13.12  | 13.29 | 12.84 | .007    |
|              | Std. Deviation | 2.50  | 2.50   | 2.08  | 2.42  |         |
| TAPSE        | Mean           | 19.51 | 20.78  | 21.85 | 20.71 | .001    |
|              | Std. Deviation | 3.71  | 2.75   | 2.75  | 3.23  |         |
| TRPV         | Mean           | 2.71  | 2.44   | 2.34  | 2.50  | .297    |
|              | Std. Deviation | 2.38  | .36    | .74   | 1.46  |         |
| Systolic PAP | Mean           | 31.78 | 29.91  | 27.91 | 29.87 | .038    |
|              | Std. Deviation | 9.18  | 8.11   | 9.11  | 8.91  |         |

RVGLS: right ventricular global longitudinal strain, LVEF: left ventricular ejection fraction, LVEDD: left ventricular end-diastolic diameter, LVESD: left ventricular end- systolic diameter, IVSD: interventricular septal diameter, LAVI: left atrial volume index, RVEDD: right ventricular end- diastolic diameter, RV FAC: right ventricular fractional area change, TAPSE: tricuspid annular plane systolic excursion, TRPV: tricuspid regurgitation peak velocity, PAP: pulmonary artery pressure, ICU: Intensive Care Unit
